# Supplementary material
Source: PubMed Central journal article supplement (PMC2859495)

## Supplemental Information

### Supplemental Methods

#### Mass spectrometry analysis

In order to identify the components of the purified complexes, bands were cut on the SDS-PAGE gel all along the migration lane of the immunoprecipitated complex, as well as on the control lane. Proteins of the different gel slices were treated with 10mM DTT and 55 mM iodoacetamide for cysteine alkylation, and digested with trypsin (Promega). The resulting peptides were extracted from the gel by successive incubations in 10% formic acid/acetonitrile (1/1) and dried in a speed-vac. Peptides were reconstituted in 5% acetonitrile, 0.05% trifluoroacetic acid and analyzed by nanoLC-MS/MS using an Ultimate3000 system (Dionex) coupled to a LTQ-Orbitrap mass spectrometer (Thermo Fisher Scientific). Elution from the analytical column (75- $\mu$ m inner diameter x 15-cm PepMap C18, Dionex) was performed using a 60min acetonitrile gradient at a flow rate of 300 nL/min. The LTQ-Orbitrap was operated in information-dependant acquisition mode with the XCalibur software. Survey scan MS were acquired in the Orbitrap on the 300-2000 m/z range with the resolution set to a value of 60000. The five most intense ions per survey scan were selected for CID fragmentation and the resulting fragments were analyzed in the linear trap (LTQ). Dynamic exclusion was employed within 60 seconds to prevent repetitive selection of the same peptide. The Mascot Daemon software (version 2.2.0, Matrix Science) was used to perform database searches against human entries in Uniprot. Peaklists were created with ExtractMSN (provided with Xcalibur version 2.0 SR2, Thermo Fisher Scientific) with the following parameters: parent ions in the mass range 400-4500, no grouping of MS/MS scans, threshold at 1000. For database search, carbamidomethylation of cysteines was set as a fixed modification, oxidation of methionines, O-GlcNAc glycosylation and phosphorylation of serines and threonines were set as variable modifications, and the mass tolerances in MS and MS/MS were set to 10 ppm and 0.6 Da, respectively. Mascot results were parsed with the in-house developed software MFPaQ version 4.0 and protein hits were automatically validated if they were assigned at least one top ranking peptide with a p-value < 0.05. The software was also used to extract MS signal of identified proteins from raw files, and to calculate mean ratio of peptides intensity signal between the lane of immunopurified complex and the control lane. Proteins were considered as potential specific partners if they were exclusively identified by MS/MS sequencing in the lane of the complex with a significant score, or if the ratio of their signal intensity between the complex and control lanes was above 10.

#### Primer sequences

1 ) Primers used in ChIP-QPCR experiments :

- “ -178 ” Forward : 5'-CCCACACAAAACATGGTAGCA-3'  
Reverse : 5'-ATGGGCCCCATTGGATATGGACATG -3'  
“ +84 ” Forward : 5'-AAAGTGCTGTCTGGCTCCAAC-3'  
Reverse : 5'-GACAGAGTGGGAAGGGTTAGGTT-3'  
“ +2530 ” Forward : 5'-GAGGAAGAAGAGAAGGAGAGGAACA-3'  
Reverse : 5'-ATCCACACATCAGACATTCATCTCTAT-3'  
“ p107 ” Forward : 5'-CCGGAGGAAAAACGGACTTT-3'  
Reverse : 5'-CTGCGGGACGTGTTGTCAT -3'  
“ Gal4UAS ” Forward : 5'-TCATCAATGTATCTTATCATGTCTGGAT-3'  
Reverse : 5'-CGGAATGCCAAGCTGGAA -3'

2 ) Primers used in Q-PCR experiments :

- “ actin ” Forward : 5'-TCCCTGGAGAAGAGCTACGA-3'  
Reverse : 5'-AGGAAGGAAGGCTGGAAGAG -3'  
“ GAPDH ” Forward : 5'-GAGTCAACGGATTTGGTCGT-3'

Reverse : 5'-GACAAGCTTCCCGTTCTCAG -3'

Thap1, RRM1, HCF-1, OGT : Quantitect primers assays have been purchased from Qiagen (sequences are not provided by Qiagen)

## Supplemental figure legends

**Fig. S1.** THAP3, HCF-1 and OGT co-sediment on glycerol gradients. (A) Nuclear extracts from HeLa cells expressing the human THAP3-Flag/HA protein (t-THAP3) were fractionated on a 10 to 40% glycerol gradient. Fractions were analyzed by SDS-PAGE and western blotting with anti-HA mAb. The migration of molecular weights markers bovine serum albumin (60 kDa) and thyroglobulin (670 kDa) is indicated. Fractions 3-7 corresponding to complex 1 (C1) were pooled for subsequent immunoprecipitation with anti-Flag antibody. (B) HCF-1 and OGT co-sediment with t-THAP3 in low (about 0,6 MDa) and high (about 2MDa) molecular-weight complexes. Nuclear extracts from t-THAP3 HeLa cells were fractionated on a 10 to 40% glycerol gradient and collected fractions were immunoblotted with anti-OGT and anti-HCF-1 antibodies. (C) t-THAP3 co-immunoprecipitated proteins from uninduced (mock) and induced cells were separated by SDS-PAGE and immunoblotted with the indicated antibodies.

**Fig. S2.** O-glycosylation of HCF1. Peptides ions carrying a labile post-translational modification of mass 203.07937, potentially corresponding to an N-acetyl-hexosamine, were detected by Mascot database searching for the protein HCF-1 (Uniprot accession number P51610). The table shows the position of the detected peptides in the protein sequence, and for each peptide ion: the mass to charge ratio (m/z), charge (z), theoretical mass, experimental mass, calculated mass deviation in ppm, Mascot identification score, Mascot rank (sequences of rank 1 correspond to the best matching sequence for a given MS/MS spectrum), peptide sequence, post-translational modification assigned by Mascot, integrated elution peak area (reflecting the abundance of the peptide ion), and elution time from the nanoLC column. As HCF-1 was identified in various bands cut from the migration lanes of the THAP3 immunopurified complexes, MS/MS identification data and peak area are given only for the band in which a given glycosylated peptide was identified with the best Mascot score. For each detected glycosylated peptide ion, the MS signal of its non-glycosylated counterpart ion was also extracted to evaluate approximately the level of glycosylation. In some cases, the corresponding non-glycosylated peptide ion of same charge was not sequenced (N.S.), but MS/MS identification data is given for ions of lower or higher charge state, if available. Moreover, in some cases, no MS signal could be detected at all for non-glycosylated species (N.D.). Although some species assigned by Mascot as glycosylated peptides were identified with a very low score, sequences shown in this table are proposed to be glycosylated based on the following criteria: i) detection of a peptide ion bearing a modification of 203.07937 Da with high mass accuracy (mass deviation <4ppm) on a high resolution Orbitrap mass spectrometer, ii) detection in the MS/MS spectrum of an intense ion corresponding to a loss of 203.1 Da from the parent ion, characteristic of a labile O-glycosylation lost under CID (collision-induced dissociation) MS/MS sequencing, and iii) detection of the non-glycosylated peptide ion with a shift in elution time of about 1-2 min from the glycosylated peptide, due to different migration behaviour on the reverse-phase nanoLC column. (N.B.: for species assigned by Mascot as doubly glycosylated peptides, two elution times are indicated in some cases due to the detection of two very close but distinct elution peaks, possibly related to heterogeneous patterns of glycosylation on the peptide). Doubly-glycosylated peptides are shown in red, singly-glycosylated peptides in orange, non-glycosylated peptides in yellow.

**Fig S3.** Evolutionary conservation of the HBMs in THAP-zf proteins. (A) The primary structure of the eight human THAP-zf proteins containing consensus HBMs and their putative orthologues in zebrafish and xenopus is shown above the alignment of their HBMs. The THAP-zf is indicated in grey and the predicted coiled-coil domains in dark grey. Red asterisk indicates the position of the HBM in each primary sequence. Residues underlined in red correspond to the first residues of the predicted coiled-coil domains. (B) Multiple alignment of the HBMs found in THAP-zf proteins. The alignment was generated with Clustal W (<http://www.ebi.ac.uk/cgi-bin/clustalw>) according to the Blosum matrix and colored with Boxshade

(<http://www.ch.embnet.org>). Black boxes indicate identical residues, whereas shaded boxes show similar amino-acids. Dashed lines represent gaps introduced to align sequences. The most represented amino acids are shown in the consensus line.

**Fig. S4.** Identification of human THAP-zf protein cDNAs in large scale two-hybrid screens with an HCF-1 bait. HF7c yeast strain was transformed with pGAL29 encoding the HCF-1 kelch domain (amino acids 3-455) fused to the GAL4 DNA binding domain. The resulting strain was transformed with a HeLa Matchmaker library (Clontech) and plated on SD-Leu/Trp/His media. DNA was isolated from His<sup>+</sup>/β-galactosidase<sup>+</sup> clones and the nucleotide sequence was determined. Of the positive cDNA clones, 14 encoded THAP proteins as detailed in the Table. The number of times a clone was isolated encoding the indicated THAP protein is shown (#). The portion of the THAP-zf protein encoded in various isolated clones is indicated.

**Fig. S5.** Endogenous THAP1 recruits endogenous HCF-1 to the *RRM1* promoter in proliferating HUVECs. (A) Schematic representation of the human *RRM1* promoter. The binding sites for THAP1 (THABS) and E2Fs are indicated. The position of the DNA fragments analyzed in ChIP-qPCR assays are shown. (B) Knockdown of THAP1 reduces recruitment of THAP1 and HCF1 to the *RRM1* promoter *in vivo*. ChIP-qPCR assays with anti-THAP1, anti-HCF1 or ChIP control (Abcam) rabbit antibodies were performed using proliferating primary HUVECs treated with control or THAP1 siRNAs. Immunoprecipitated DNA was quantified in triplicate by qPCR using the % of input method. In brief, the amount of genomic DNA co-precipitated with anti-THAP1 antibodies was calculated as a % of total input the following way:  $\Delta CT = CT(\text{input}) - CT(\text{THAP1-IP})$ ,  $\% \text{input} = 2^{-\Delta CT} \times 0.25$  (0.25% of total input was used). These independent experiments provide additional evidence for an important role of THAP1 in HCF-1 recruitment to the *RRM1* promoter *in vivo* (see Figure 5 of the manuscript).

**Fig. S6.** Knockdown of endogenous OGT in primary HUVECs does not modify *RRM1* mRNA levels. (A,B) Knockdown of endogenous OGT was performed with 4 individual ON-TARGET-plus OGT siRNAs. (A) OGT and Tubα (loading control) expression levels were analyzed by western blot. (B) RNA was isolated from cells transfected with individual OGT siRNAs, 48h after siRNA transfection, and used for qPCR analysis with the indicated human gene primers (*OGT*, *RRM1*, *HCF-1*, *THAP1* and control gene *GAPDH*). *Actin* was used as a control gene for normalization. Results are shown as means with s.d. from 3 separate datapoints.

Figure S1

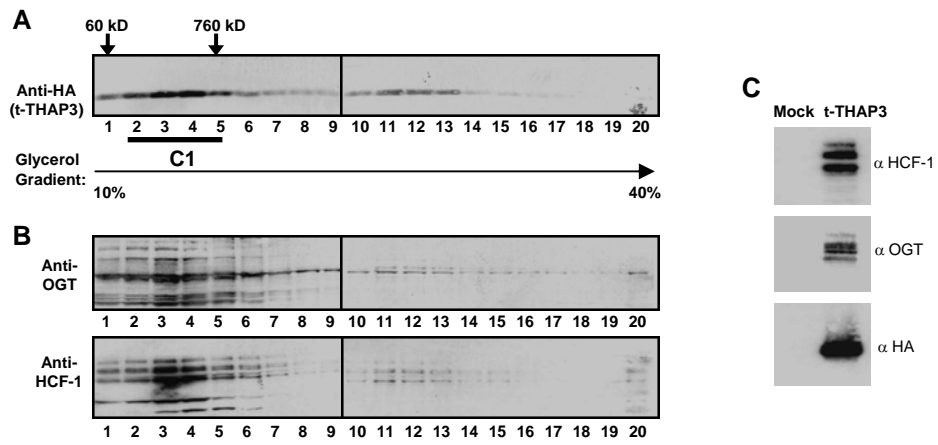

# Figure S2

| Position  | m/z       | z | Theo. Mass | Exp. Mass | delta (ppm) | Score | Rank | Sequence                           | PTM        | Peak Area | elution time |
|-----------|-----------|---|------------|-----------|-------------|-------|------|------------------------------------|------------|-----------|--------------|
| 400-426   | 959.8239  | 3 | 2876.4444  | 2876.4499 | 1.91        | 30    | 1    | YDIPATAATATSPTPNPVPSPANPPK         | HexNAc     | 64176     | 25.2         |
|           | 892.1309  | 3 | 2673.3650  | 2673.3709 | 2.22        | N.S.  | N.S. | YDIPATAATATSPTPNPVPSPANPPK         |            | 978981    | 26.8         |
|           | 1337.6920 | 2 | 2673.3650  | 2673.3694 | 1.67        | 63    | 1    | YDIPATAATATSPTPNPVPSPANPPK         |            |           |              |
| 489-511   | 830.0963  | 3 | 2487.2639  | 2487.2671 | 1.26        | 29    | 1    | VTGPQATTGTPLVTMoxRPASQAGK          | HexNAc     | 142617    | 19.8         |
|           | 762.4044  | 3 | 2284.1846  | 2284.1866 | 0.88        | 18    | 1    | VTGPQATTGTPLVTMoxRPASQAGK          |            | 375210    | 20.3         |
| 512-524   | 735.9127  | 2 | 1469.8090  | 1469.8108 | 1.27        | 9     | 1    | APVTVTSLPAGVR                      | HexNAc     | 302271    | 21.5 / 21.8  |
|           | 634.3732  | 2 | 1266.7296  | 1266.7302 | 0.51        | 51    | 1    | APVTVTSLPAGVR                      |            | 1121128   | 23.1         |
| 579-594   | 1006.0110 | 2 | 2010.0079  | 2010.0074 | -0.22       | 9     | 1    | TMoxAVTPGTTTLPATVK                 | 2 HexNAc   | 191864    | 21.7 / 22.7  |
|           | 904.4720  | 2 | 1806.9285  | 1806.9294 | 0.52        | 46.01 | 1    | TMoxAVTPGTTTLPATVK                 | HexNAc     | 641204    | 23.3         |
|           | 802.9332  | 2 | 1603.8491  | N.D.      | N.D.        | N.S.  | N.S. | TMoxAVTPGTTTLPATVK                 |            | N.D.      | N.D.         |
| 612-637   | 1002.1888 | 3 | 3003.5361  | 3003.5452 | 3.03        | 9     | 4    | TAAAVQGVTSVSSATNTSTRPIITVHK        | 2 HexNAc   | 138768    | 18.1 / 19.2  |
|           | 934.4946  | 3 | 2800.4567  | 2800.4620 | 1.89        | N.S.  | N.S. | TAAAVQGVTSVSSATNTSTRPIITVHK        | HexNAc     | 160607    | 18.8 / 19.8  |
|           | 866.8010  | 3 | 2597.3773  | 2597.3812 | 1.49        | N.S.  | N.S. | TAAAVQGVTSVSSATNTSTRPIITVHK        |            | 57376     | 20.6         |
| 638-659   | 1268.6730 | 2 | 2535.3280  | 2535.3314 | 1.35        | 45    | 1    | SGTVTVAAQQAQVVTTVGGVTK             | 2 HexNAc   | 31763     | 21.9         |
|           | 1167.1316 | 2 | 2332.2486  | N.D.      | N.D.        | N.S.  | N.S. | SGTVTVAAQQAQVVTTVGGVTK             | HexNAc     | N.D.      | N.D.         |
|           | 1065.5919 | 2 | 2129.1693  | N.D.      | N.D.        | N.S.  | N.S. | SGTVTVAAQQAQVVTTVGGVTK             |            | N.D.      | N.D.         |
| 683-713   | 1135.2730 | 3 | 3402.7917  | 3402.7972 | 1.62        | 58    | 1    | VMoxSVVQTKPVQTSVAVTGQASTGPTVQIIQTK | HexNAc     | 66822     | 24.9         |
|           | 1067.5810 | 3 | 3199.7123  | 3199.7212 | 2.78        | 58    | 1    | VMoxSVVQTKPVQTSVAVTGQASTGPTVQIIQTK |            | 3782      | 25.8         |
| 771-793   | 1210.6340 | 2 | 2419.2516  | 2419.2534 | 0.76        | 57    | 1    | TIPMoxSAITQAGATGVTSSPGIK           | HexNAc     | 44428     | 24.9         |
|           | 1109.0934 | 2 | 2216.1722  | N.D.      | N.D.        | N.S.  | N.S. | TIPMoxSAITQAGATGVTSSPGIK           |            | N.D.      | N.D.         |
| 794-802   | 588.8403  | 2 | 1175.6649  | 1175.6660 | 0.96        | 5     | 4    | SPITIIITK                          | HexNAc (T) | 1854574   | 25.0         |
|           | 487.2999  | 2 | 972.5855   | 972.5852  | -0.30       | 44    | 1    | SPITIIITK                          |            | 114340    | 27.4         |
| 856-875   | 1113.1740 | 2 | 2224.3294  | 2224.3334 | 1.81        | 17    | 1    | LVTPTVSAVKPAVTTLVVK                | HexNAc     | 182824    | 28           |
|           | 1011.6345 | 2 | 2021.2500  | 2021.2544 | 2.18        | N.S.  |      | LVTPTVSAVKPAVTTLVVK                |            | 39126     | 30.5         |
|           | 674.7590  | 3 | 2021.2500  | 2021.2552 | 2.54        | 44    | 1    | LVTPTVSAVKPAVTTLVVK                |            |           |              |
| 1233-1244 | 496.5697  | 3 | 1486.6834  | 1486.6873 | 2.58        | 9     | 2    | HSHAVSTAAMoxTR                     | HexNAc     | 42294     | 8.9          |
|           | 428.8763  | 3 | 1283.6041  | 1283.6071 | 2.34        | N.S.  |      | HSHAVSTAAMoxTR                     |            | 86875     | 9.3          |
|           | 642.8110  | 2 | 1283.6041  | 1283.6074 | 2.64        | 46    | 1    | HSHAVSTAAMoxTR                     |            |           |              |
| 1483-1500 | 985.0272  | 2 | 1968.0416  | 1968.0398 | -0.88       | 34    | 1    | AVTTVTQSTPVPGPSVPK                 | HexNAc (S) | 107656    | 22.7         |
|           | 883.4901  | 2 | 1764.9622  | 1764.9656 | 1.92        | 38    | 1    | AVTTVTQSTPVPGPSVPK                 |            | 300096    | 24.2         |

# Figure S3

**A**

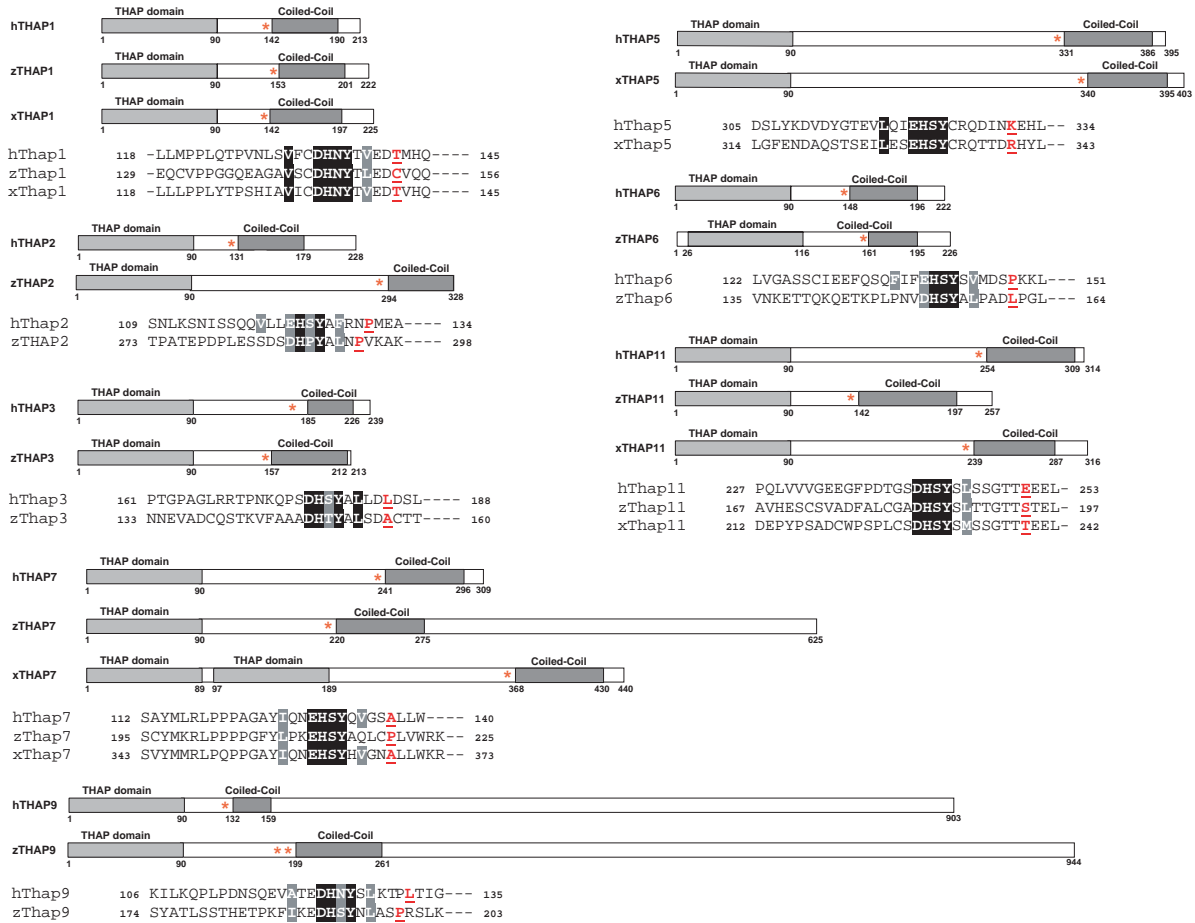

**B**

hThap1 118 --LLMPPLQTPVNLVFC<sup>D</sup>HN<sup>Y</sup>TV<sup>E</sup>EDTMHQ--- 145  
xThap1 118 --LLLPLYTPSHIAV<sup>I</sup>CD<sup>H</sup>NY<sup>T</sup>EDTVHQ--- 145  
zThap1 129 --EQCVPPGGQ<sup>E</sup>AGAV<sup>S</sup>CD<sup>H</sup>NY<sup>T</sup>ED<sup>C</sup>VQ<sup>Q</sup>--- 156  
zThap3 133 --NNEVADCQ<sup>S</sup>T<sup>K</sup>V<sup>F</sup>AA<sup>A</sup>D<sup>H</sup>T<sup>Y</sup>A<sup>L</sup>SD<sup>A</sup>CTT--- 160  
zThap6 135 --VNKETTQ<sup>K</sup>Q<sup>E</sup>T<sup>K</sup>P<sup>L</sup>P<sup>N</sup>V<sup>D</sup>H<sup>S</sup>Y<sup>A</sup>L<sup>P</sup>A<sup>D</sup>L<sup>P</sup>G<sup>L</sup>--- 164  
hThap11 227 --PQLVVVGE<sup>E</sup>GF<sup>P</sup>D<sup>T</sup>G<sup>S</sup>D<sup>H</sup>S<sup>Y</sup>S<sup>S</sup>SG<sup>T</sup>T<sup>E</sup>E<sup>E</sup>L 253  
xThap11 212 --DEPYPSAD<sup>C</sup>W<sup>P</sup>S<sup>P</sup>L<sup>C</sup>S<sup>D</sup>H<sup>S</sup>Y<sup>S</sup>M<sup>S</sup>SG<sup>T</sup>T<sup>E</sup>E<sup>L</sup> 242  
zThap11 167 AVHESCSVAD-FAL-CGADHSYS-LTTGTTSTEL 197  
hThap7 112 --SAYMLRLPPPAGAY<sup>I</sup>Q<sup>N</sup>E<sup>H</sup>S<sup>Y</sup>Q<sup>V</sup>G<sup>S</sup>ALLW--- 140  
xThap7 343 --SVYMMRLP<sup>Q</sup>PP<sup>G</sup>AY<sup>I</sup>Q<sup>N</sup>E<sup>H</sup>S<sup>Y</sup>H<sup>V</sup>GN<sup>A</sup>LL<sup>W</sup>KR--- 373  
zThap7 195 --SCYMKRLPPP<sup>G</sup>F<sup>Y</sup>L<sup>P</sup>K<sup>E</sup>H<sup>S</sup>Y<sup>A</sup>Q<sup>L</sup>C<sup>L</sup>PLV<sup>W</sup>RK--- 225  
hThap5 305 --DSL<sup>Y</sup>K<sup>D</sup>V<sup>D</sup>Y<sup>G</sup>T-E<sup>V</sup>L<sup>Q</sup>I<sup>E</sup>H<sup>S</sup>Y<sup>C</sup>R<sup>Q</sup>D<sup>I</sup>N<sup>K</sup>E<sup>H</sup>L--- 334  
xThap5 314 --L<sup>G</sup>F<sup>E</sup>N<sup>D</sup>A<sup>Q</sup>S<sup>T</sup>S-E<sup>I</sup>L<sup>E</sup>S<sup>E</sup>H<sup>S</sup>Y<sup>C</sup>R<sup>Q</sup>T<sup>T</sup>D<sup>R</sup>H<sup>Y</sup>L--- 343  
hThap9 106 --KILKQPLPDNSQ<sup>E</sup>VAT<sup>E</sup>D<sup>H</sup>NY<sup>S</sup>L<sup>K</sup>TP<sup>L</sup>TIG--- 135  
hThap3 161 --PTGPAGLRRT<sup>P</sup>N<sup>K</sup>Q<sup>P</sup>S<sup>D</sup>H<sup>S</sup>Y<sup>A</sup>L<sup>L</sup>D<sup>L</sup>D<sup>S</sup>L--- 188  
zTHAP2 273 ----TPATEPDPLESSD<sup>S</sup>DP<sup>H</sup>Y<sup>A</sup>L<sup>N</sup>P<sup>V</sup>K<sup>A</sup>K--- 298  
zThap9 174 --SYATLSS<sup>T</sup>HET<sup>P</sup>K<sup>F</sup>L<sup>K</sup>E<sup>D</sup>H<sup>S</sup>Y<sup>N</sup>L<sup>A</sup>S<sup>P</sup>RS<sup>L</sup>K--- 203  
hThap2 109 --SNLKSNISSQ<sup>Q</sup>---V<sup>L</sup>L<sup>E</sup>H<sup>S</sup>Y<sup>A</sup>F<sup>R</sup>N<sup>P</sup>M<sup>E</sup>A--- 134  
hThap6 122 --L<sup>V</sup>G<sup>A</sup>S<sup>S</sup>C<sup>I</sup>E<sup>E</sup>F<sup>Q</sup>S<sup>Q</sup>F<sup>I</sup>F<sup>E</sup>H<sup>S</sup>Y<sup>S</sup>M<sup>D</sup>S<sup>P</sup>K<sup>K</sup>L--- 151

consensus v dHsY v

## Figure S4

| <b>Protein</b> | <b>#</b> | <b>amino acids</b>                      |
|----------------|----------|-----------------------------------------|
| THAP3          | 3        | 128-239<br>153-239                      |
| THAP4          | 1        | 291-577                                 |
| THAP7          | 5        | 223-309                                 |
| THAP11         | 5        | 73-313<br>203-313<br>206-313<br>216-313 |



Figure S5

**A**

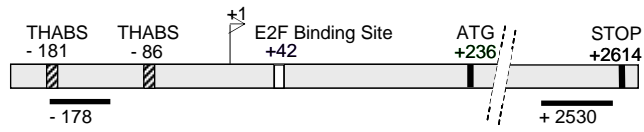

**B**

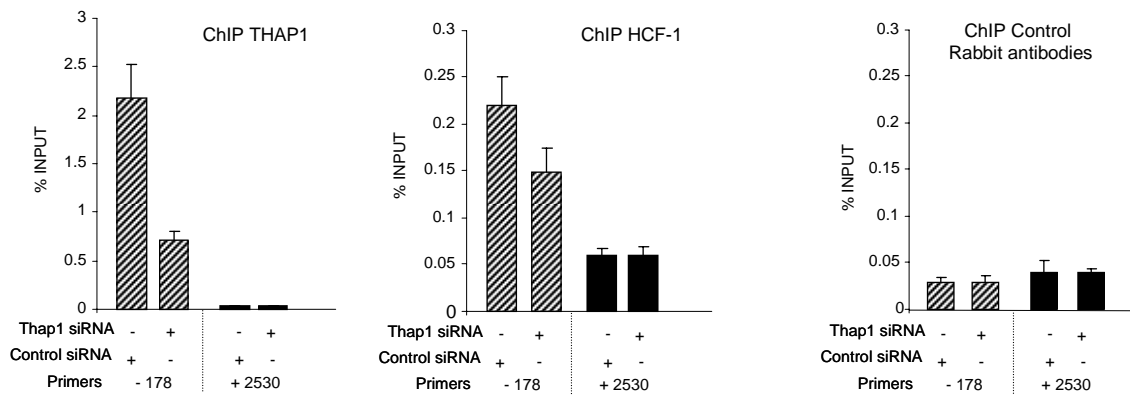

Figure S6

**A**

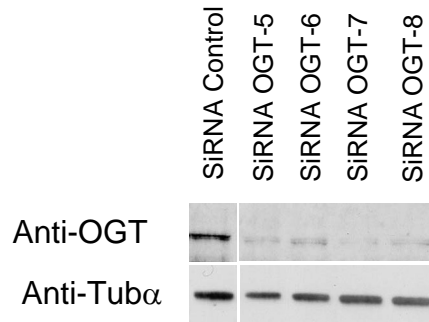

**B**

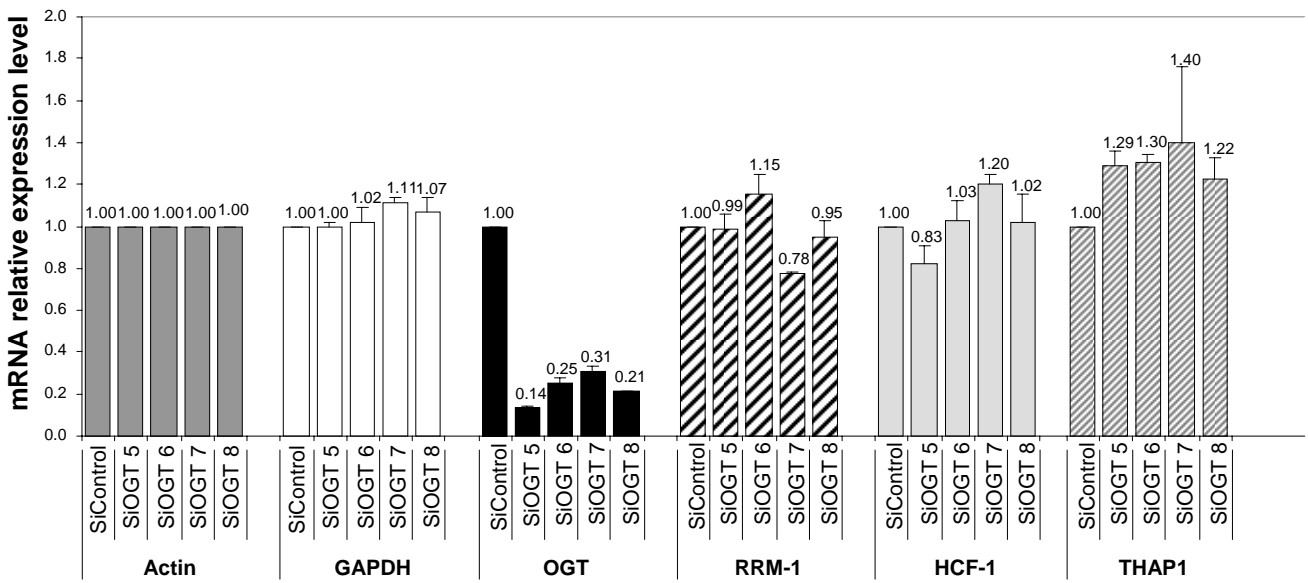

Supplement: supp_M109.072579_jbc.M109.072579-1.pdf [file supp_M109.072579_jbc.M109.072579-1.pdf]
